# Supplementary material for: Easily constructed porous silver films for efficient catalytic CO2 reduction and Zn–CO2 batteries
Source: Royal Society of Chemistry journal article supplement (doi:10.1039/d4nr00340c), 2024-01-01
Supplement: d4nr00340c1.pdf [file d4nr00340c1.pdf]

## Supplementary Material

### Easily constructed porous silver films for efficient catalytic CO<sub>2</sub> reduction and Zn-CO<sub>2</sub> batteries

*Junyang Ding<sup>a</sup>, Tianran Wei<sup>b</sup>, Tong Hou<sup>b</sup>, Weijia Liu<sup>b</sup>, Qian Liu<sup>c</sup>, Hao Zhang<sup>a\*</sup>, Jun Luo<sup>d</sup>,  
and Xijun Liu<sup>b\*</sup>*

<sup>a</sup> Institute for New Energy Materials & Low-Carbon Technologies, School of Materials Science and Engineering, Tianjin University of Technology, Tianjin 300384, China

<sup>b</sup> State Key Laboratory of Featured Metal Materials and Life-cycle Safety for Composite Structures, Guangxi Key Laboratory of Processing for Non-ferrous Metals and Featured Materials, MOE Key Laboratory of New Processing Technology for Nonferrous Metals and Materials, School of Resources, Environment and Materials, Guangxi University, Nanning, 530004 Guangxi, China

<sup>c</sup> Institute for Advanced Study, Chengdu University, Chengdu 610106, Sichuan, China

<sup>d</sup> ShenSi Lab, Shenzhen Institute for Advanced Study, University of Electronic Science and Technology of China, Longhua District, Shenzhen 518110, China

**\*E-mail:** xjliu@gxu.edu.cn; ho.zhang@foxmail.com

## Figures and Table

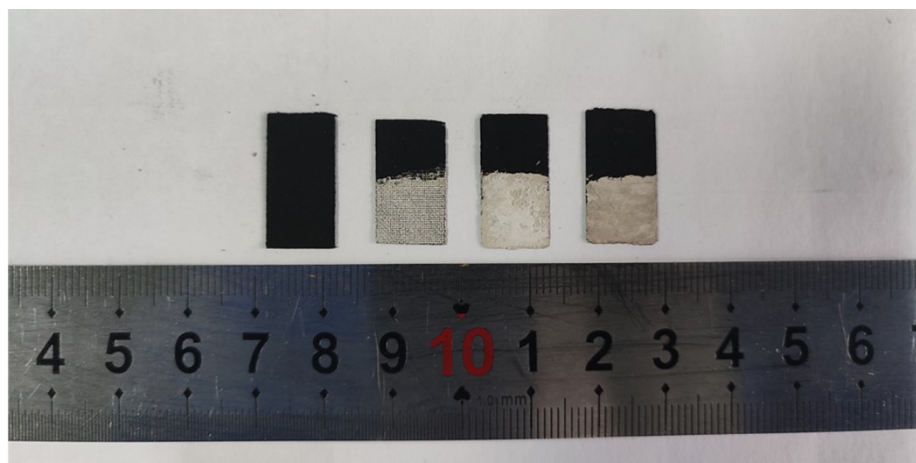

**Figure S1.** The optical photos of the as-prepared samples (from left to right: CP, Ag/CP, SBA-15/Ag/CP, and p-Ag/CP).

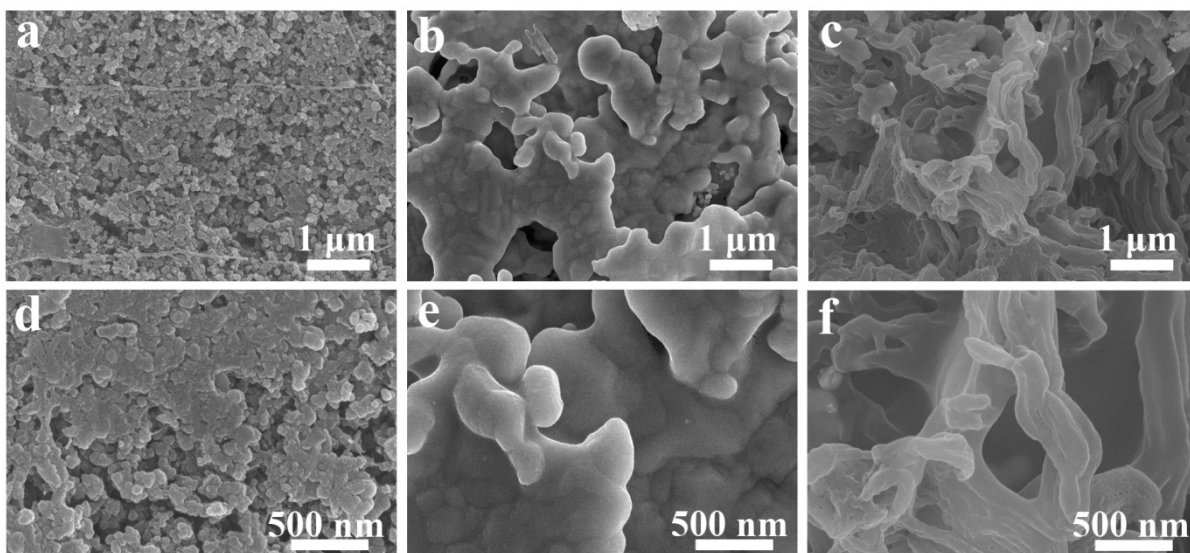

**Figure S2.** SEM images of (a, d) CP, (b, e) Ag/CP, and (c, f) p-Ag/CP.

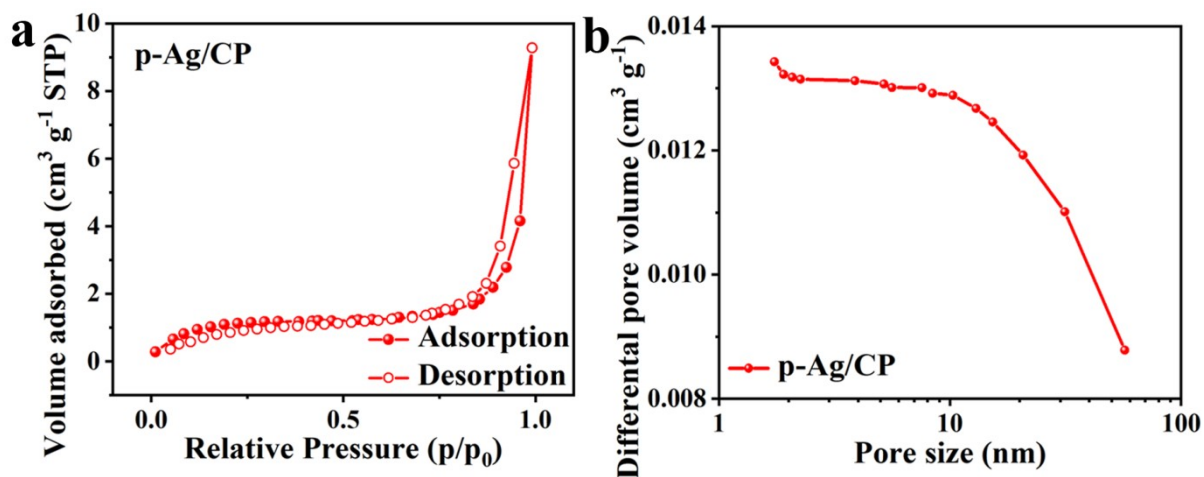

**Figure S3.** (a) The nitrogen sorption isotherms at 77 K (closed, adsorption; open, desorption) and (b) corresponding pore size distribution curves for p-Ag/CP.

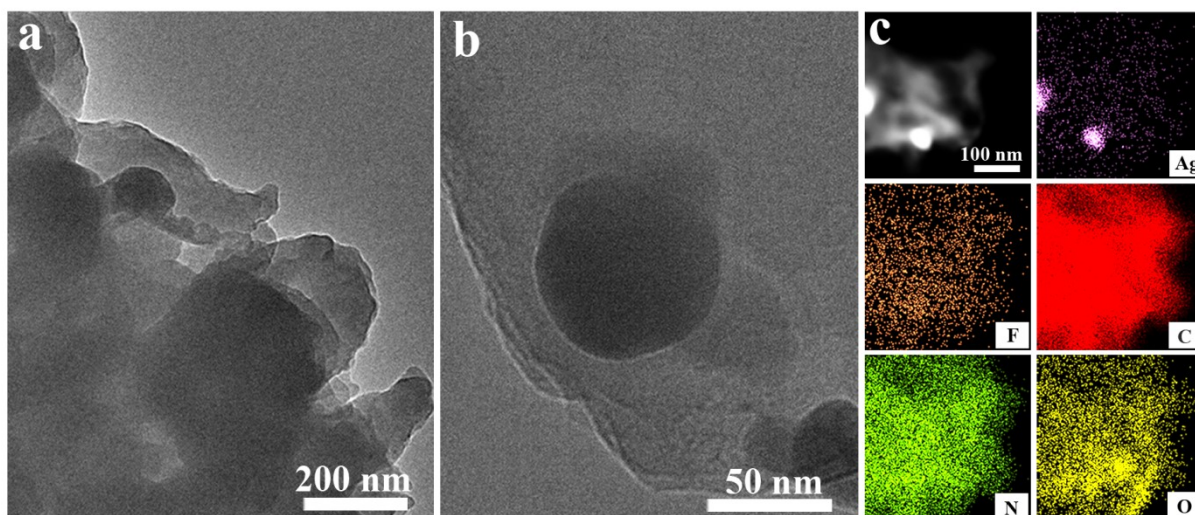

**Figure S4.** (a, b) TEM and (c) elemental mapping images of p-Ag/CP.

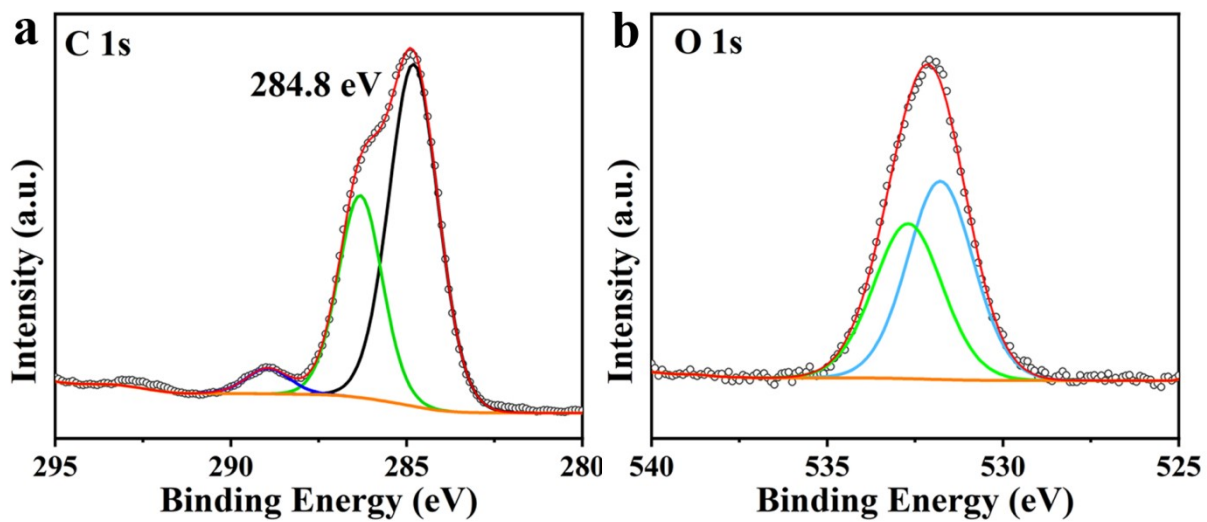

Figure S5. High-resolution XPS spectrum (a) C 1s and (b) O 1s of p-Ag/CP.

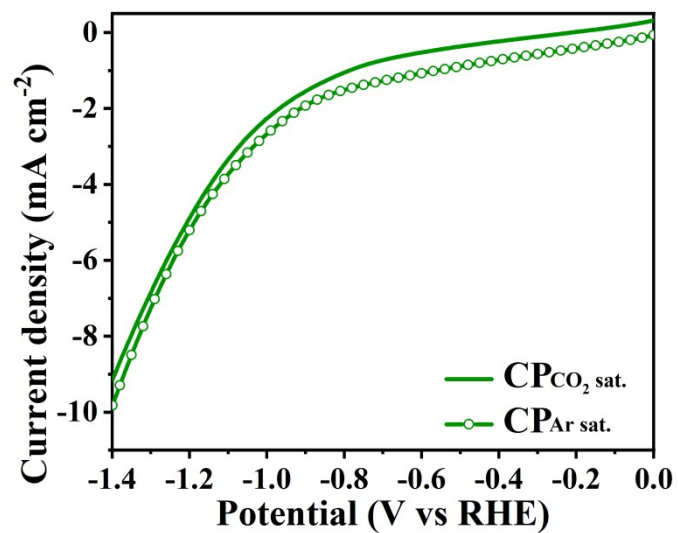

**Figure S6.** LSV curves ( $5 \text{ mV s}^{-1}$ ) for the CP in Ar- and  $\text{CO}_2$ -saturated  $0.1 \text{ M KHCO}_3$  solution.

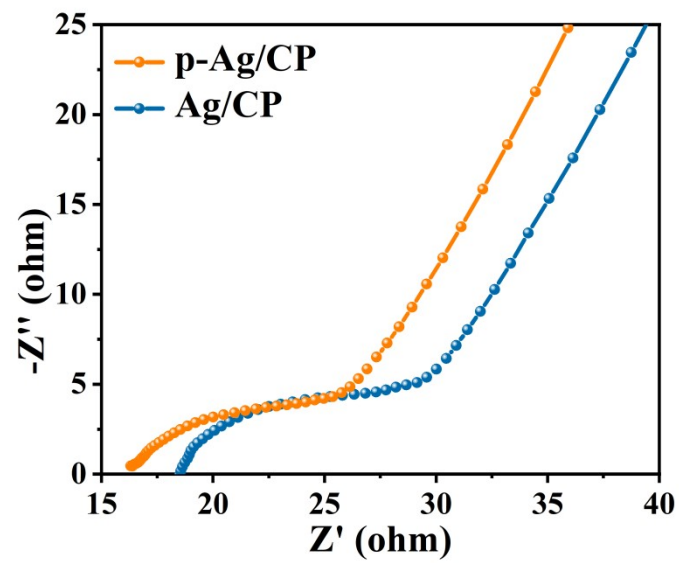

**Figure S7.** Nyquist diagrams of the Ag/CP and p-Ag/CP.



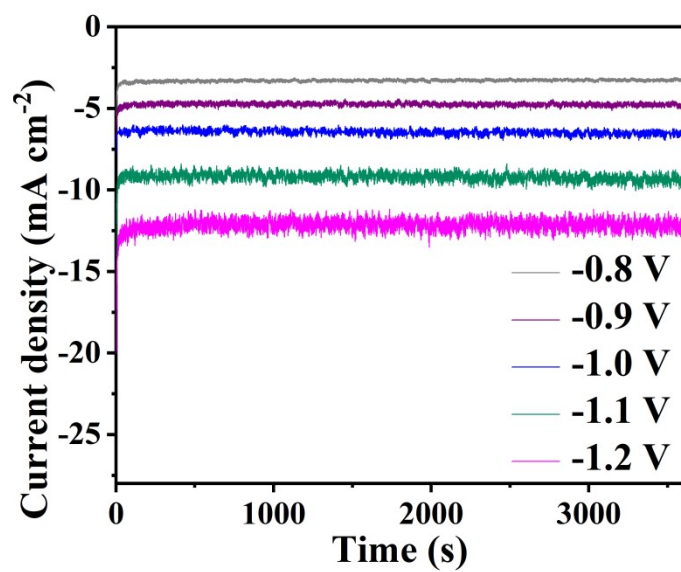

Figure S8. The i-t test results of p-Ag/CP in CO<sub>2</sub>RR.

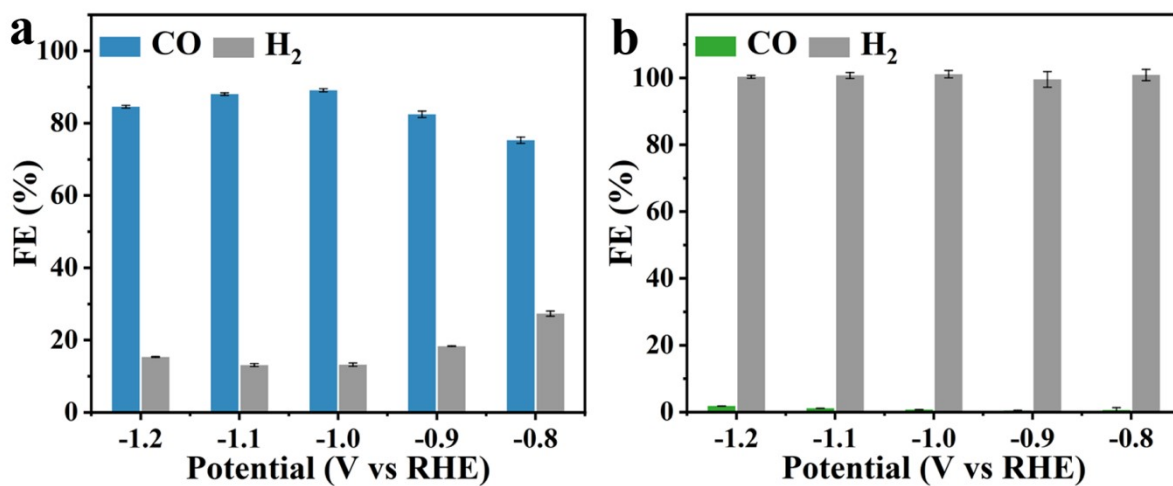

**Figure S9.** FE<sub>CO</sub> value of (a) Ag/CP and (b) CP at various applied potentials.

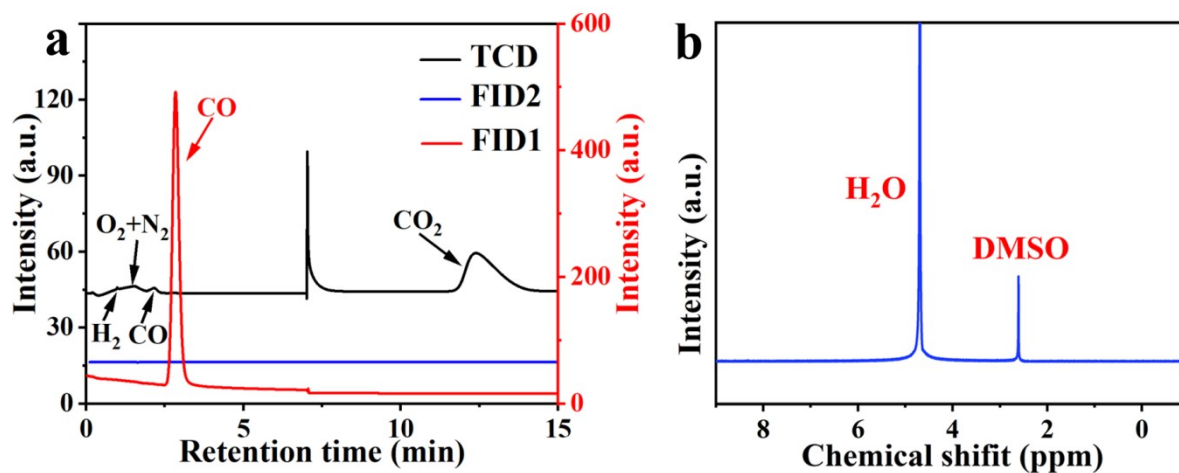

**Figure S10.** (a) GC curves of the  $CO_2RR$  gas product for p-Ag/CP at -1.0 V vs RHE. Only main CO and trace amounts of  $H_2$  can be detected as a reduction product for both TCD and FID channels. (b)  $^1H$  NMR spectrum of the  $CO_2RR$  liquid product for p-Ag/CP at -1.0 V vs RHE. The DMSO was added as an internal standard, and no liquid reduction product can be detected.

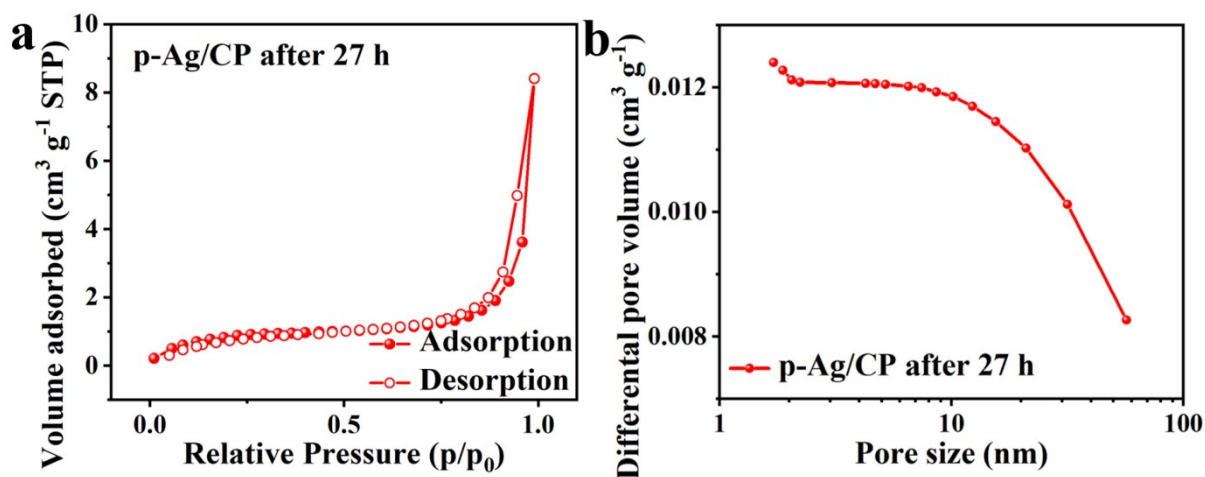

**Figure S11.** (a) The nitrogen sorption isotherms at 77 K (closed, adsorption; open, desorption) and (b) corresponding pore size distribution curves for p-Ag/CP after  $\text{CO}_2\text{RR}$  stability test. The obtained BET specific surface area of p-Ag/CP after  $\text{CO}_2\text{RR}$  stability test is  $3.42 \text{ m}^2 \text{ g}^{-1}$ .

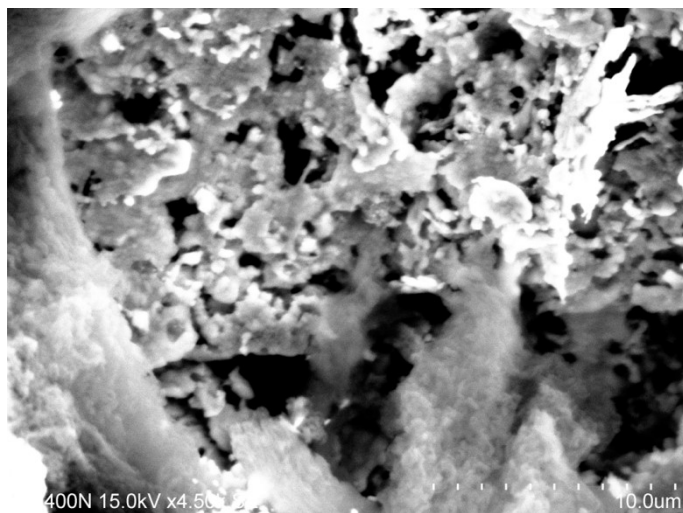

**Figure S12.** SEM image of p-Ag/CP after CO<sub>2</sub>RR stability test.

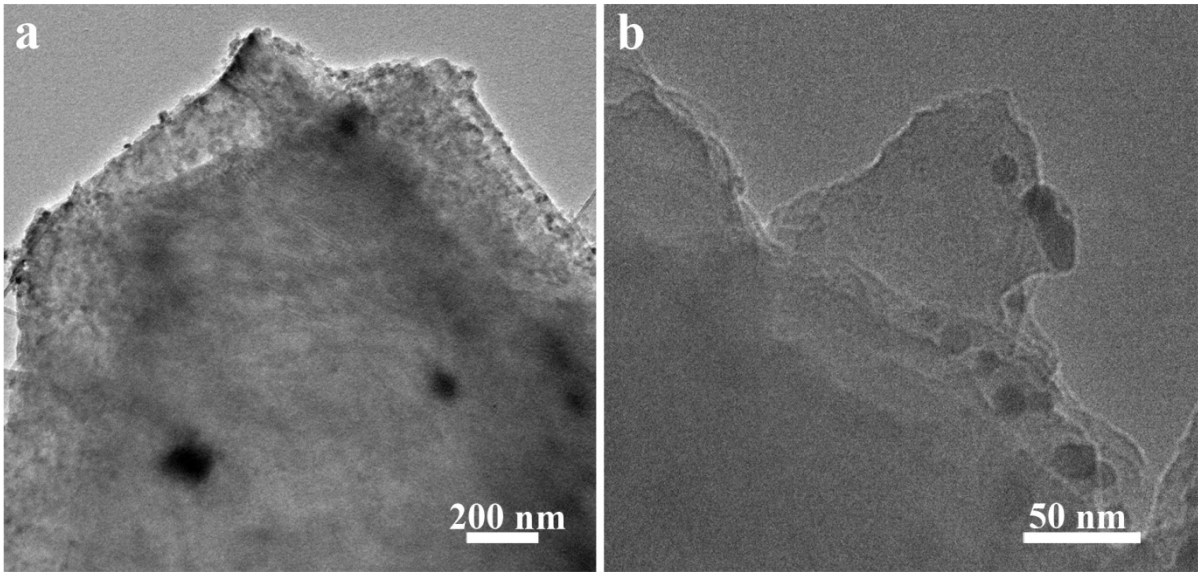

**Figure S13.** TEM image of p-Ag/CP after CO<sub>2</sub>RR stability test.

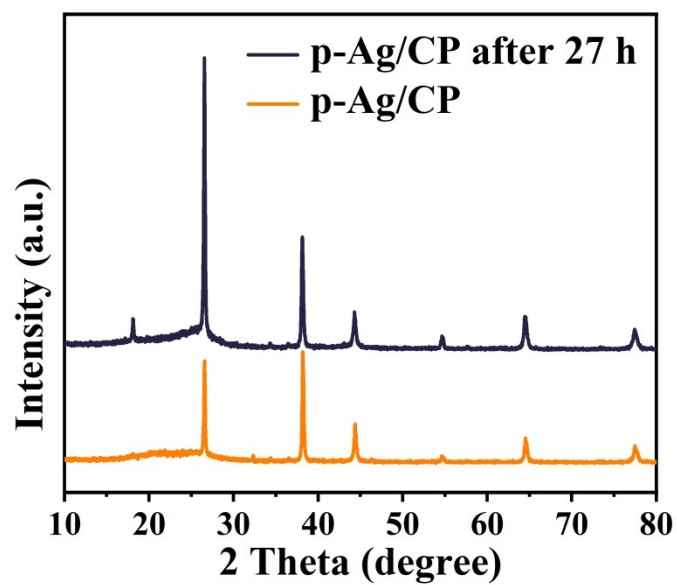

**Figure S14.** XRD patterns of p-Ag/CP before and after CO<sub>2</sub>RR stability test.

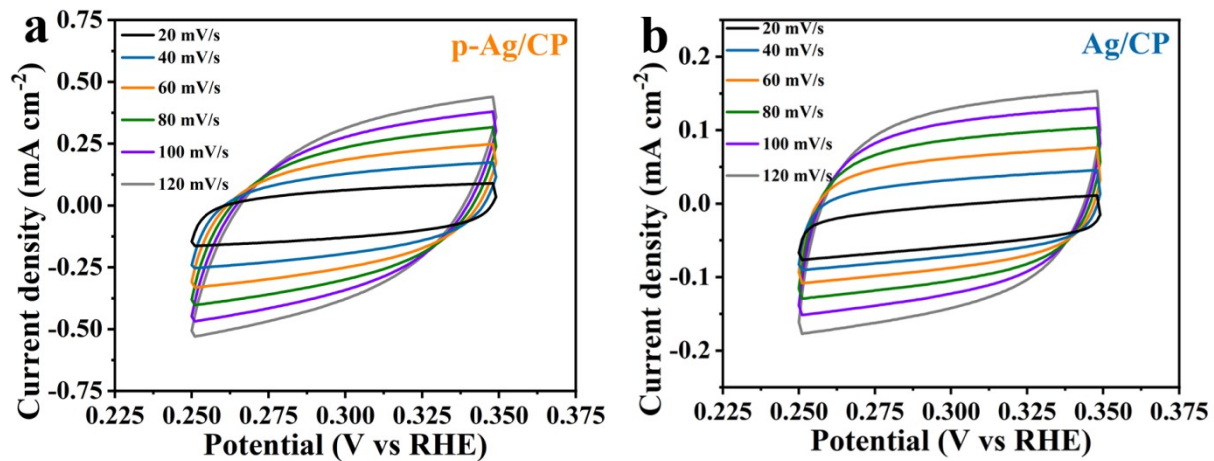

Figure S15. CV curves of p-Ag/CP and Ag/CP in non-Faradaic regions.



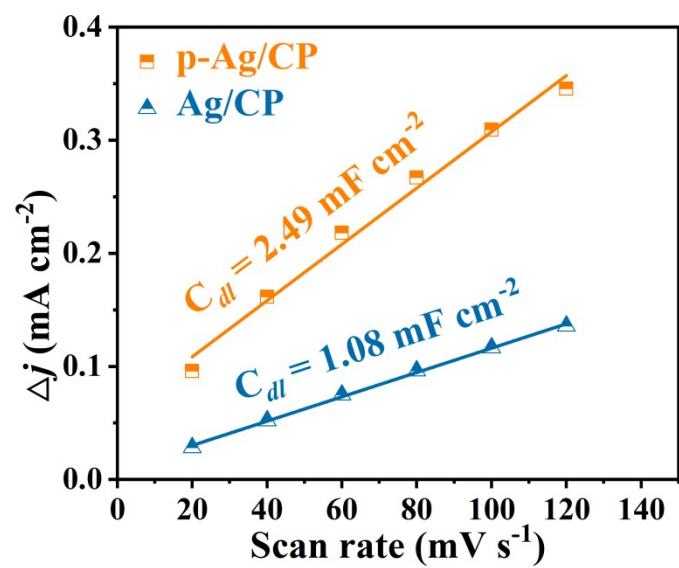

Figure S16. The  $C_{dl}$  values of p-Ag/CP and Ag/CP samples.

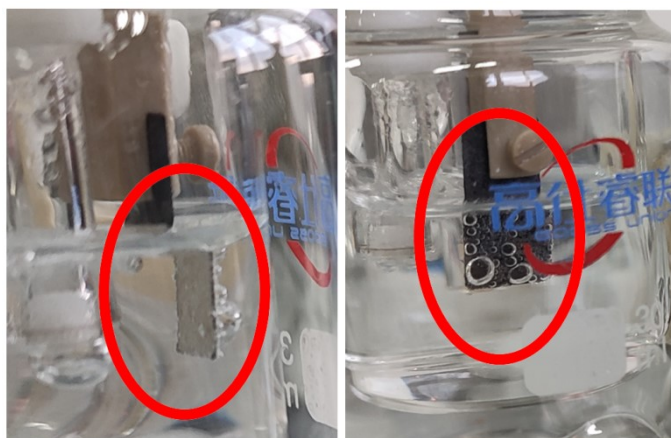

**Figure S17.** The optical picture for surface of p-Ag/CP in the CO<sub>2</sub>RR.

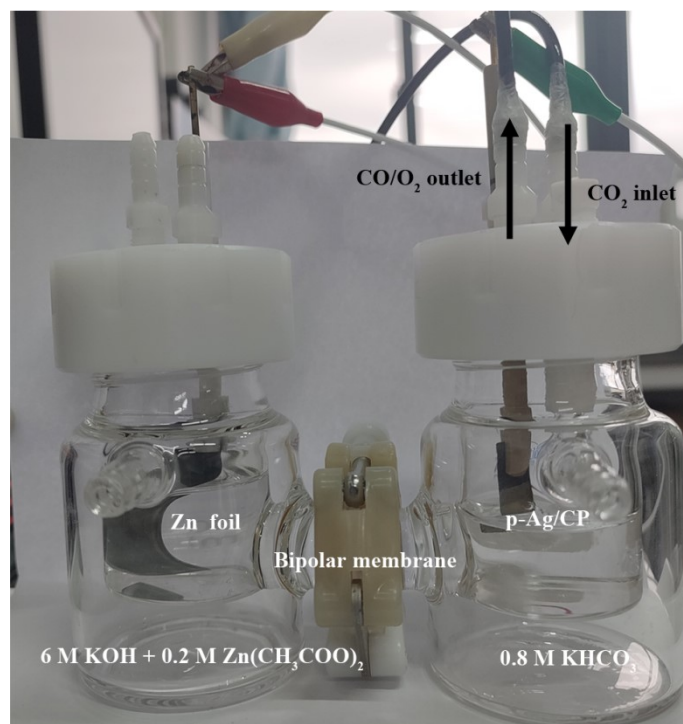

**Figure S18.** The optical picture of assembled Zn-CO<sub>2</sub> battery with p-Ag/CP cathode.

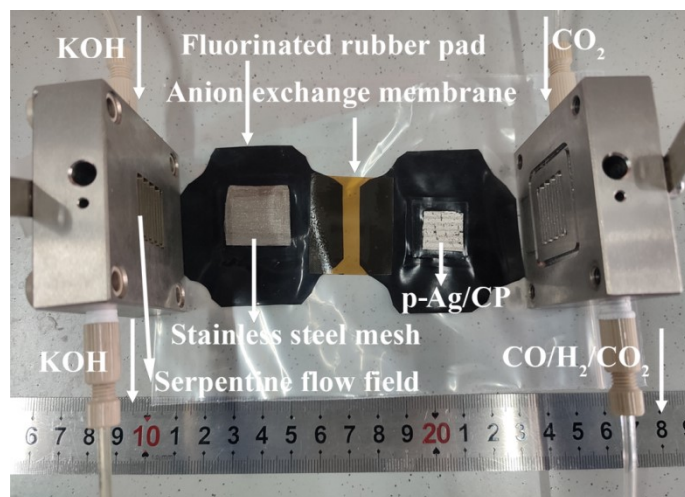

**Figure S19.** The optical picture of MEA for CO<sub>2</sub>RR.

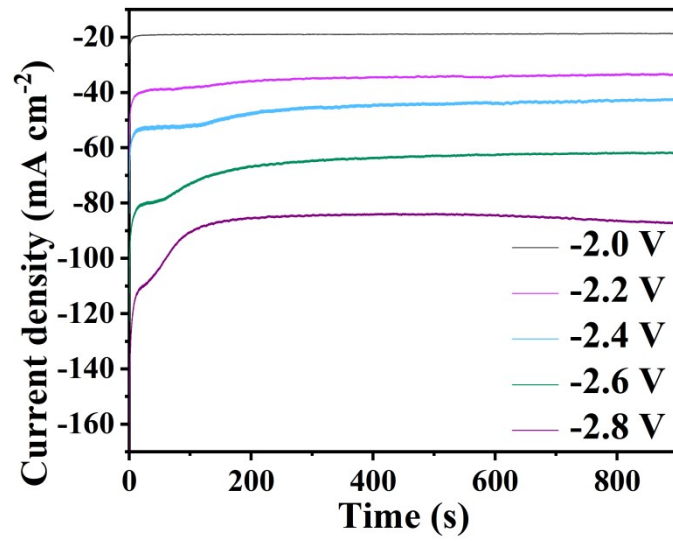

**Figure S20.** The *i-t* test results of p-Ag/CP in MEA.

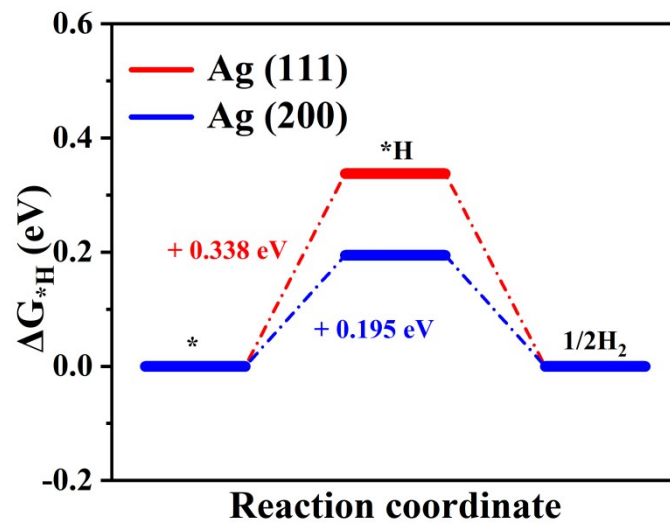

Figure S21. The calculated free energy profile of p-Ag/CP for HER.

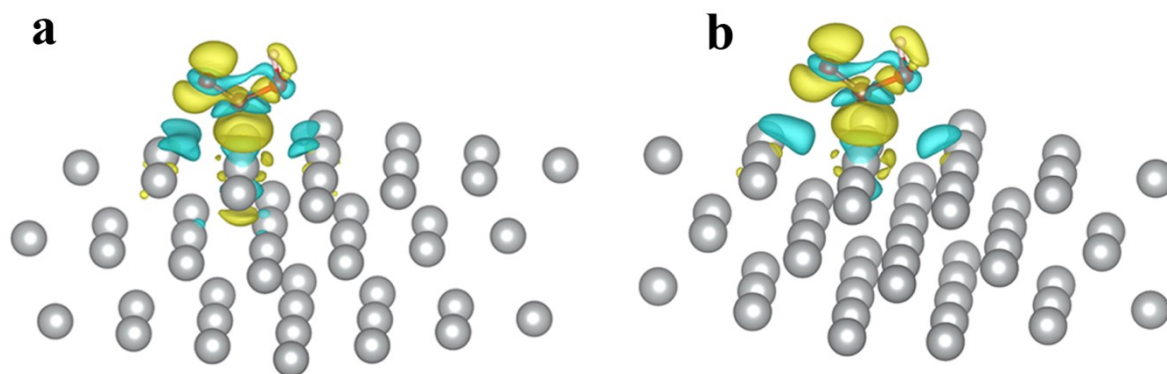

**Figure S22.** Charge density differences of \*COOH on (a) Ag (111) and (b) Ag (200) surface of p-Ag/CP. Note that yellow and cyan regions represent electron accumulation and loss, respectively.

**Table S1.** The element content of p-Ag/CP obtained via the EDX spectroscopy.

| Element | Line | Intensity<br>(c/s) | Content | Units | Error<br>2-sig | MDL<br>3-sig |       |
|---------|------|--------------------|---------|-------|----------------|--------------|-------|
| C       | Ka   | 394.35             | 5.026   | wt.%  | 0.164          | 0.053        |       |
| N       | Ka   | 0.99               | 0.074   | wt.%  | 0.221          | 0.331        |       |
| O       | Ka   | 11.81              | 0.119   | wt.%  | 0.041          | 0.053        |       |
| F       | Ka   | 0.70               | 0.024   | wt.%  | 0.137          | 0.208        |       |
| Ag      | La   | 1,498.41           | 94.758  | wt.%  | 1.665          | 0.939        |       |
|         |      |                    | 100.000 | wt.%  |                |              | Total |



**Table S2.** The element content of p-Ag/CP after CO<sub>2</sub>RR stability test obtained via the EDX spectroscopy.

| Element | Line | Intensity<br>(c/s) | Content | Units | Error |       | MDL   |
|---------|------|--------------------|---------|-------|-------|-------|-------|
|         |      |                    |         |       | 2-sig | 3-sig |       |
| C       | Ka   | 219.77             | 2.868   | wt.%  | 0.125 | 0.041 |       |
| N       | Ka   | 5.92               | 0.446   | wt.%  | 0.201 | 0.252 |       |
| O       | Ka   | 5.10               | 0.050   | wt.%  | 0.027 | 0.035 |       |
| F       | Ka   | 0.00               | 0.000   | wt.%  | 0.000 | 0.000 |       |
| Ag      | La   | 1,499.72           | 96.635  | wt.%  | 1.680 | 0.884 |       |
|         |      |                    | 100.000 | wt.%  |       |       | Total |

**Table S3.** Summary of the CO Faradaic efficiency, potential and stability towards CO<sub>2</sub> reduction reaction from reported electrocatalysts.

| Catalysts         | FE <sub>CO</sub> (%) | Potential (V vs RHE) | Stability | Reference |
|-------------------|----------------------|----------------------|-----------|-----------|
| p-Ag/CP           | >94.0                | -1.0                 | 27 h      | This work |
| Fe-SA/BNC         | 94                   | -0.7                 | 30 h      | [1]       |
| NSHPC             | 88                   | 0.49                 | 10        | [2]       |
| Ag-200 nm NWA     | 91                   | -0.6                 | 2 h       | [3]       |
| SD-AgPMR-30       | 60                   | 0.56                 | 10 h      | [4]       |
| Ag-NCs            | ~95                  | 0.746                | 18        | [5]       |
| Zn-N <sub>4</sub> | 95                   | 0.32                 | 75        | [6]       |

## Reference

- [1] S. Liu, M. Jin, J. Sun, Y. Qin, S. Gao, Y. Chen, S. Zhang, J. Luo, X. Liu, Coordination environment engineering to boost electrocatalytic CO<sub>2</sub> reduction performance by introducing boron into single-Fe-atomic catalyst, *Chem. Eng. J.*, 2022, 437, 135294, <http://doi.org/10.1016/j.cej.2022.135294>.
- [2] R. Li, F. Liu, Y. Zhang, M. Guo, D. Liu, Nitrogen, Sulfur Co-Doped Hierarchically Porous Carbon as a Metal-Free Electrocatalyst for Oxygen Reduction and Carbon Dioxide Reduction Reaction, *ACS Appl. Mater. Interfaces*, 2020, 12(40), 44578-44587, <http://doi.org/10.1021/acsami.0c06506>.
- [3] C. Luan, Y. Shao, Q. Lu, S. Gao, K. Huang, H. Wu, K. Yao, High-Performance Carbon Dioxide Electrocatalytic Reduction by Easily Fabricated Large-Scale Silver Nanowire Arrays, *ACS Appl. Mater. Interfaces*, 2018, 10(21), 17950-17956, <http://doi.org/10.1021/acsami.8b03461>.
- [4] J. Yang, H. Du, Q. Yu, W. Zhang, Y. Zhang, J. Ge, H. Li, J. Liu, H. Li, H. Xu, Porous silver microrods by plasma vulcanization activation for enhanced electrocatalytic carbon dioxide reduction, *J. Colloid Interface Sci.*, 2022, 606, 793-799, <http://doi.org/10.1016/j.jcis.2021.08.061>.
- [5] S. Liu, C. Sun, J. Xiao, J.-L. Luo, Unraveling Structure Sensitivity in CO<sub>2</sub> Electroreduction to Near-Unity CO on Silver Nanocubes, *ACS Catal.*, 2020, 10(5), 3158-3163, <http://doi.org/10.1021/acscatal.9b03883>.
- [6] F. Yang, P. Song, X. Liu, B. Mei, W. Xing, Z. Jiang, L. Gu, W. Xu, Highly Efficient CO<sub>2</sub> Electroreduction on ZnN<sub>4</sub>-based Single-Atom Catalyst, *Angew. Chem. Int. Ed.*, 2018, 57(38), 12303-12307, <http://doi.org/10.1002/anie.201805871>.
